# Supplementary material for: An antifouling electrochemical immunosensor for carcinoembryonic antigen based on hyaluronic acid doped conducting polymer PEDOT
Source: Royal Society of Chemistry journal article supplement (doi:10.1039/c6ra19169j), 2016-01-01
Supplement: c6ra19169j1.pdf [file c6ra19169j1.pdf]

## Supporting information

# **An antifouling electrochemical immunosensor for carcinoembryonic antigen based on hyaluronic acid doped conducting polymer PEDOT**

Wei Wang<sup>a</sup>, Min Cui<sup>a</sup>, Zhiling Song<sup>a</sup> and Xiliang Luo<sup>a\*</sup>

Key Laboratory of Sensor Analysis of Tumor Marker, Ministry of Education, College of  
Chemistry and Molecular Engineering

Qingdao University of Science and Technology

Qingdao 266042, China

Qingdao University of Science and Technology

E-mail: [xiliangluo@qust.edu.cn](mailto:xiliangluo@qust.edu.cn)

Supporting information: Figure S1, Figure S2 and Figure S3.

**Figure S1**

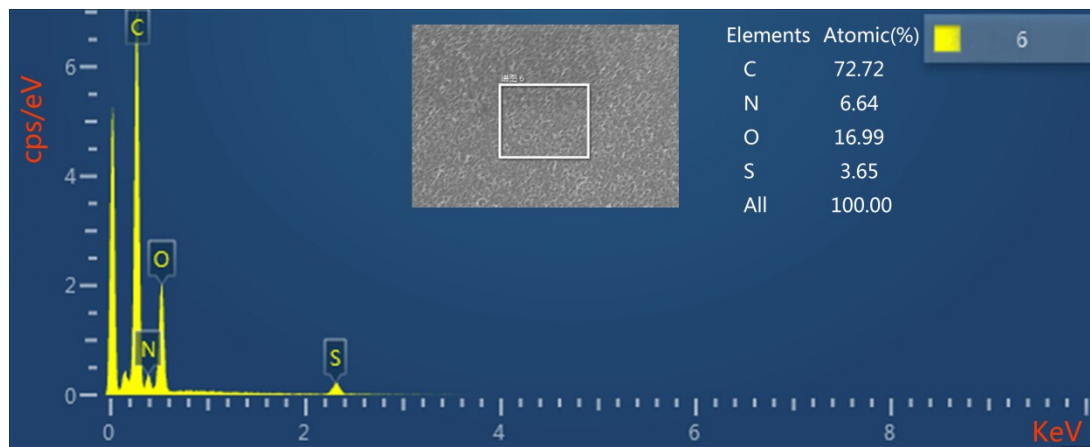

**Figure S1.** EDS spectrum and elemental analysis of PEDOT/HA composite.

**Figure S2**

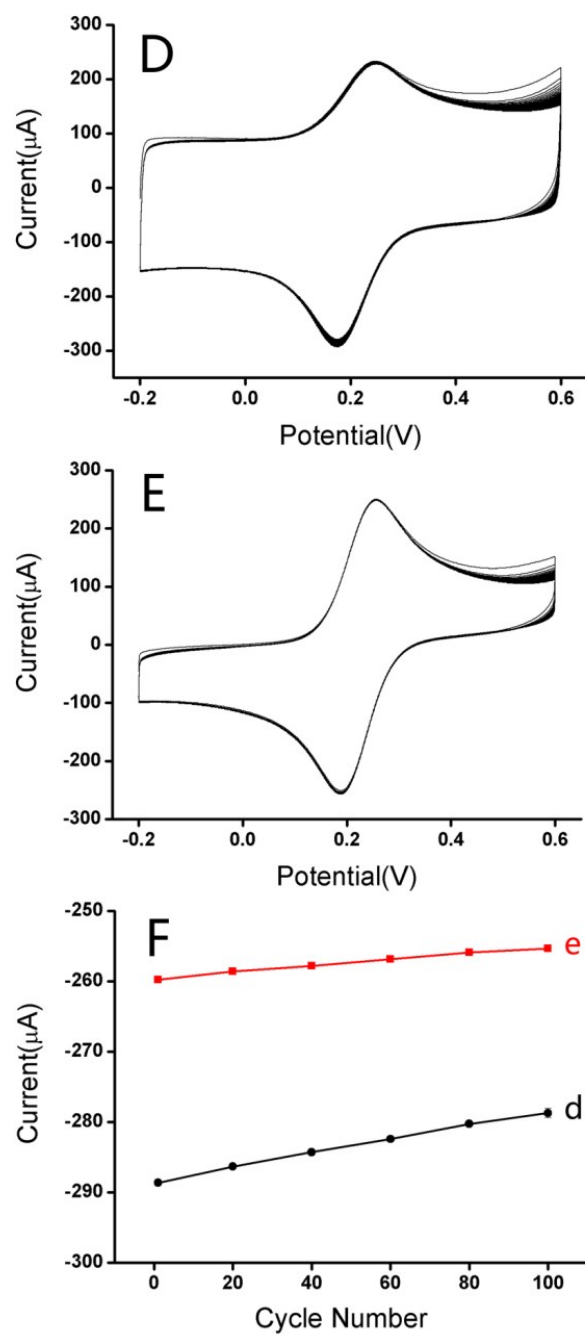

**Figure S2.** CV responses (100 cycles) of PEDOT/PSS/GCE (D) and PEDOT/HA/GCE (E) in 100% serum concentration. (F) Corresponding reductive peak currents of different cycles of PEDOT/PSS and PEDOT/HA in 100% serum concentration.

Figure S3

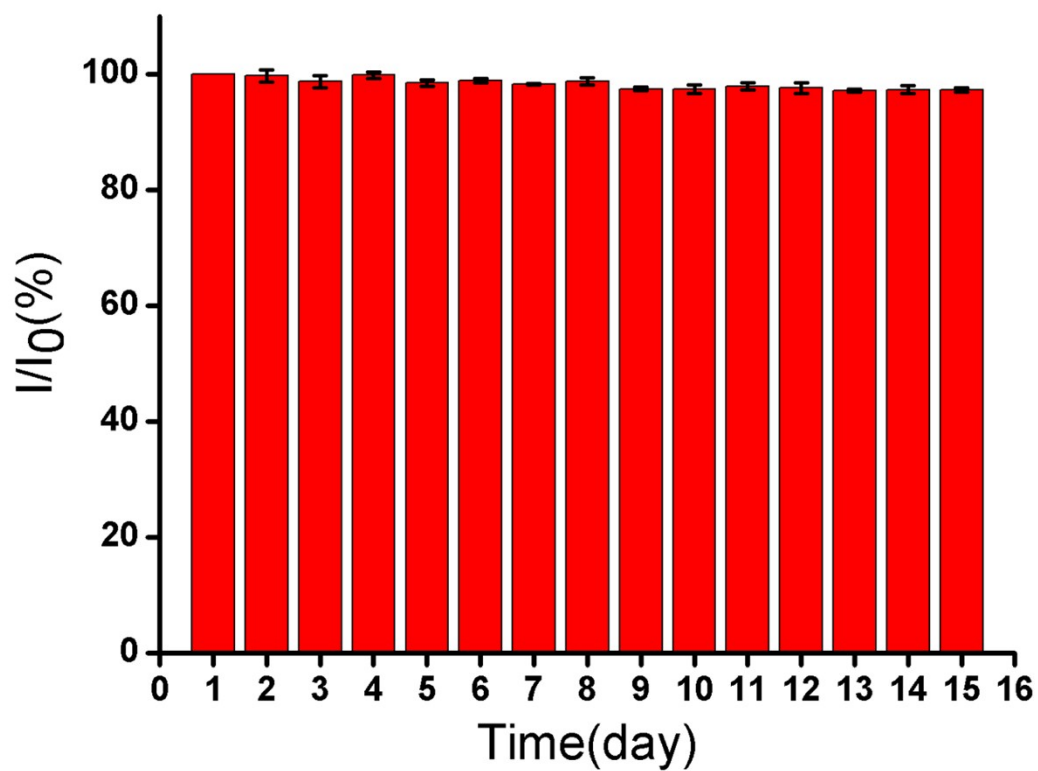

**Figure S3.** Stability of the PEDOT/HA stored at ambient conditions over a half month. DPV measured in 0.2 M PBS (pH 7.4) containing 5.0 mM  $[\text{Fe}(\text{CN})_6]^{3-/4-}$  and 0.1 M KCl, and the initial peak current was taken as 100%. Error bars demonstrate the standard deviation of three measurements.
